# Supplementary material for: Gut microbe-derived milnacipran enhances tolerance to gut ischemia/reperfusion injury
Source: PubMed Central journal article supplement — Cell Rep Med. 2023 Mar 21;4(3):100979. doi: 10.1016/j.xcrm.2023.100979 (PMC10040455; doi:10.1016/j.xcrm.2023.100979), 2023-03-21
Supplement: mmc1.pdf [file mmc1.pdf]

**Cell Reports Medicine, Volume 4**

**Supplemental information**

**Gut microbe-derived milnacipran enhances**

**tolerance to gut ischemia/reperfusion injury**

**Fan Deng, Jing-Juan Hu, Ze-Bin Lin, Qi-Shun Sun, Yue Min, Bing-Cheng Zhao, Zhi-Bin Huang, Wen-Juan Zhang, Wen-Kao Huang, Wei -Feng Liu, Cai Li, and Ke-Xuan Liu**

Figure S1

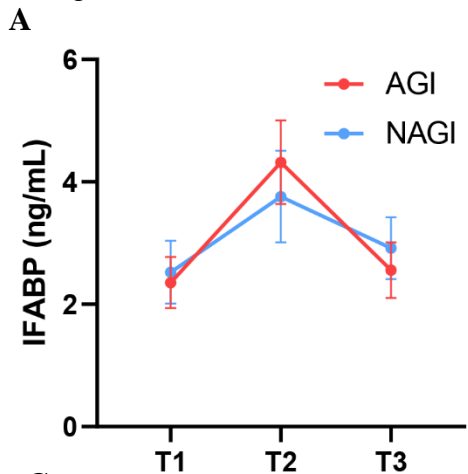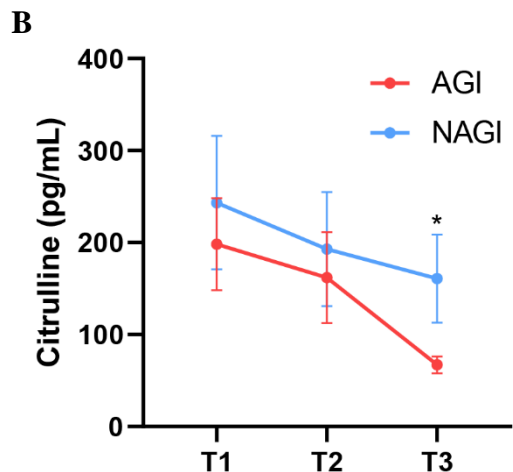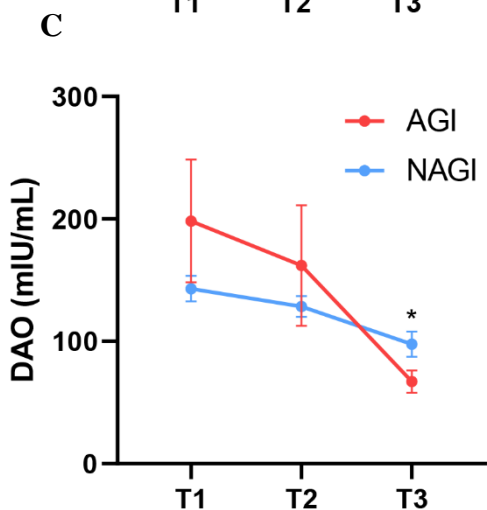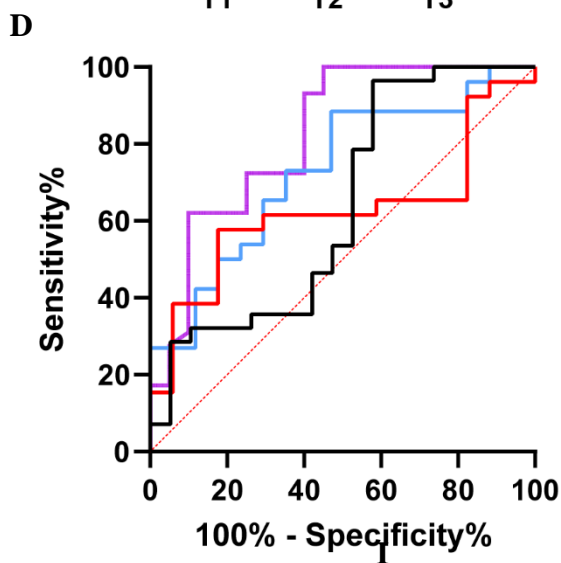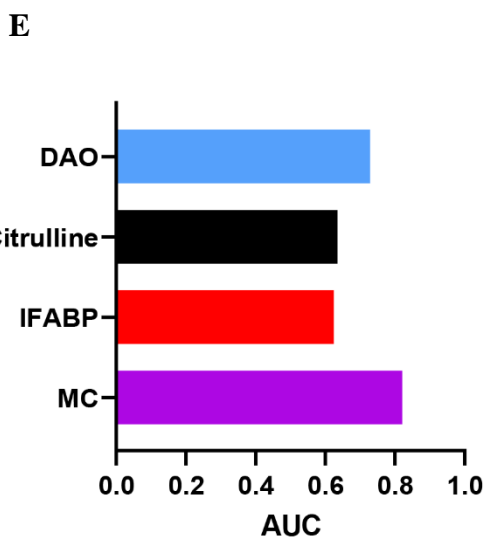

**Supplemental Figure S1. Preoperative fecal MC content in CPB patients is associated with susceptibility to postoperative intestinal injury.** Related to Figures 2.

(A-C) The levels of intestinal fatty-acid binding protein (IFABP) (A), citrulline (B) and diamine oxidase (DAO) (C) in patient serum preoperatively (T1), at the end of the operation (T2), and at 6 h after surgery (T3). (D-E) The receiver operating characteristic (ROC) analysis (D) and the area under the ROC curve (AUC) (E) to evaluate the ability of preoperative fecal MC content, plasma IFABP, citrulline, and DAO levels at T3 to distinguish postoperative acute gastrointestinal function injury ( $AGI \geq 1$ ) in patients with CPB. (A-C) The results are shown as mean $\pm$ SEM, "\*" indicates  $p < 0.05$ .

**A** Figure S2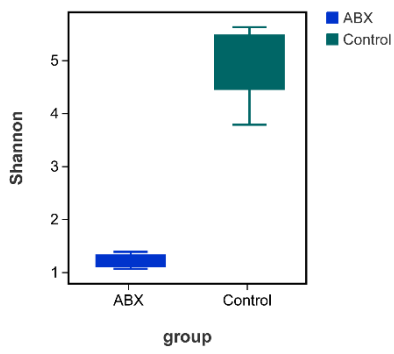**B**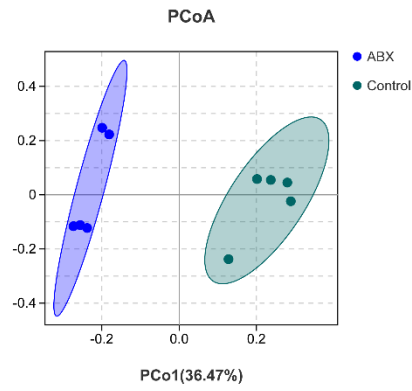**C**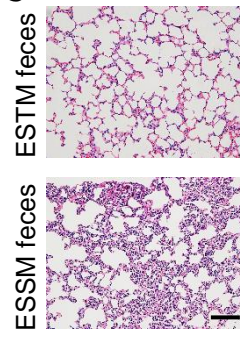**D**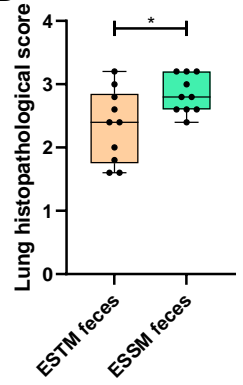**E**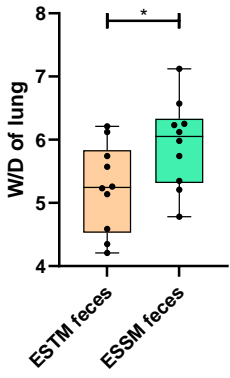**F**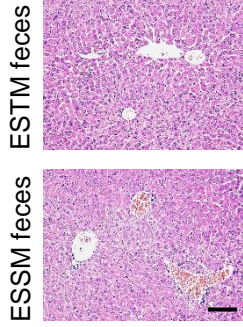**G**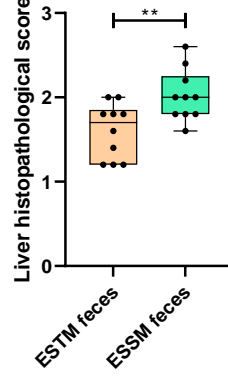**H**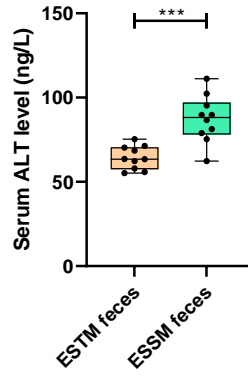**I**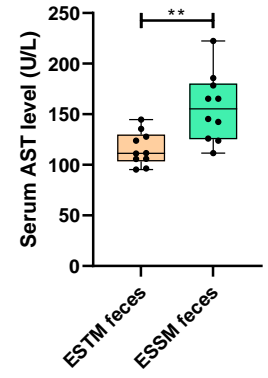**J**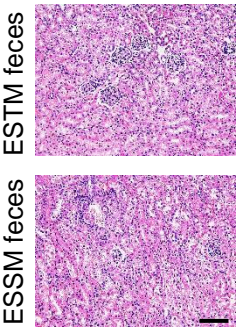**K**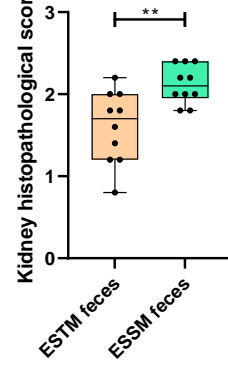**L**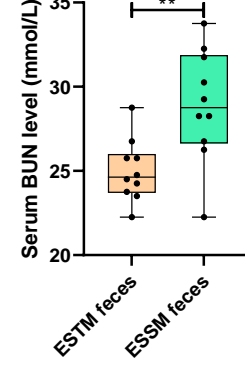**M**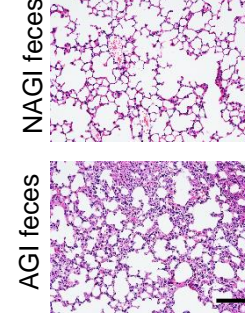**N**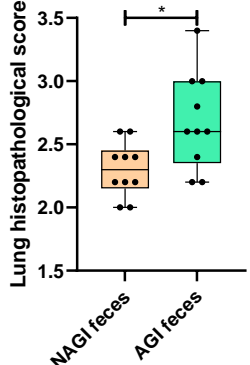**O**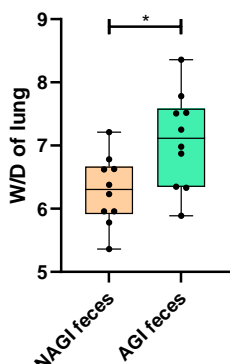**P**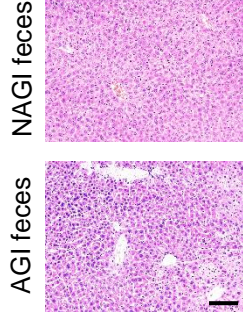**Q**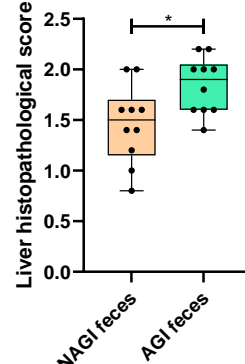**R**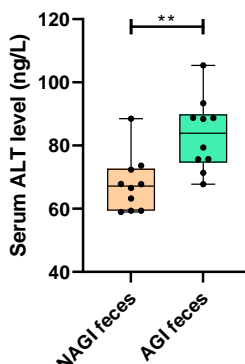**S**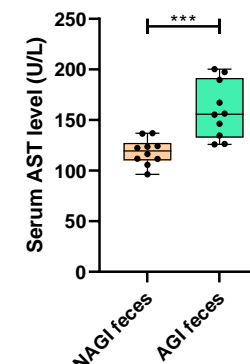**T**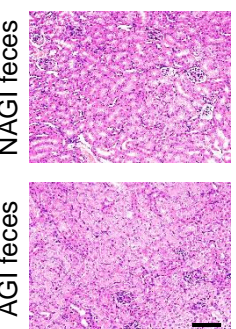**U**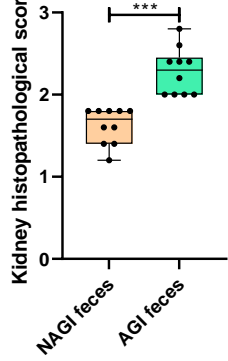**V**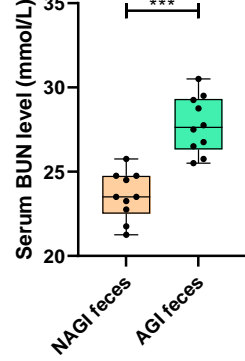

**Supplemental Figure S2. Gut microbiota affects susceptibility to enterogenic sepsis induced by intestinal ischemia/reperfusion (I/R).** Related to Figures 3.

(A, B) Alpha diversity indices (Simpson) of the control and ABX-treated mouse groups (n = 5). (B) Principal coordinate analysis (PCoA) of the control and ABX-treated mouse groups (n = 5). (C-E) Mouse lung tissue hematoxylin-eosin (HE) staining (C); the pathological damage scores (D) and wet/dry weight ratios (E); the scale bar is 100  $\mu\text{m}$  (n = 8). (F-I) Mouse liver tissue HE staining (F); the pathological damage scores (G) and plasma ALT (H) and AST levels (I); the scale bar is 100  $\mu\text{m}$  (n = 8). (J-L) Mouse kidney tissue HE staining (J); the pathological damage scores (K) and plasma BUN levels (L); the scale bar is 100  $\mu\text{m}$  (n = 8). (M-O) Mouse lung tissue HE staining (M); the pathological damage scores (N) and wet/dry weight ratios (O); the scale bar is 100  $\mu\text{m}$  (n = 8). (P-S) Mouse liver tissue HE staining (P); the pathological damage scores (Q) and plasma ALT (R) and AST levels (S); the scale bar is 100  $\mu\text{m}$  (n = 8). (T-V) Mouse kidney tissue HE staining (T); the pathological damage scores (U) and plasma BUN levels (V); the scale bar is 100  $\mu\text{m}$  (n = 8). The results are expressed as the median and quartile, and are representative of three independent experiments. \*  $p < 0.05$ , \*\*  $p < 0.01$ , \*\*\*  $p < 0.001$  by were determined by Mann Whitney test in (A), and adonis analysis and anosim analysis in (B).

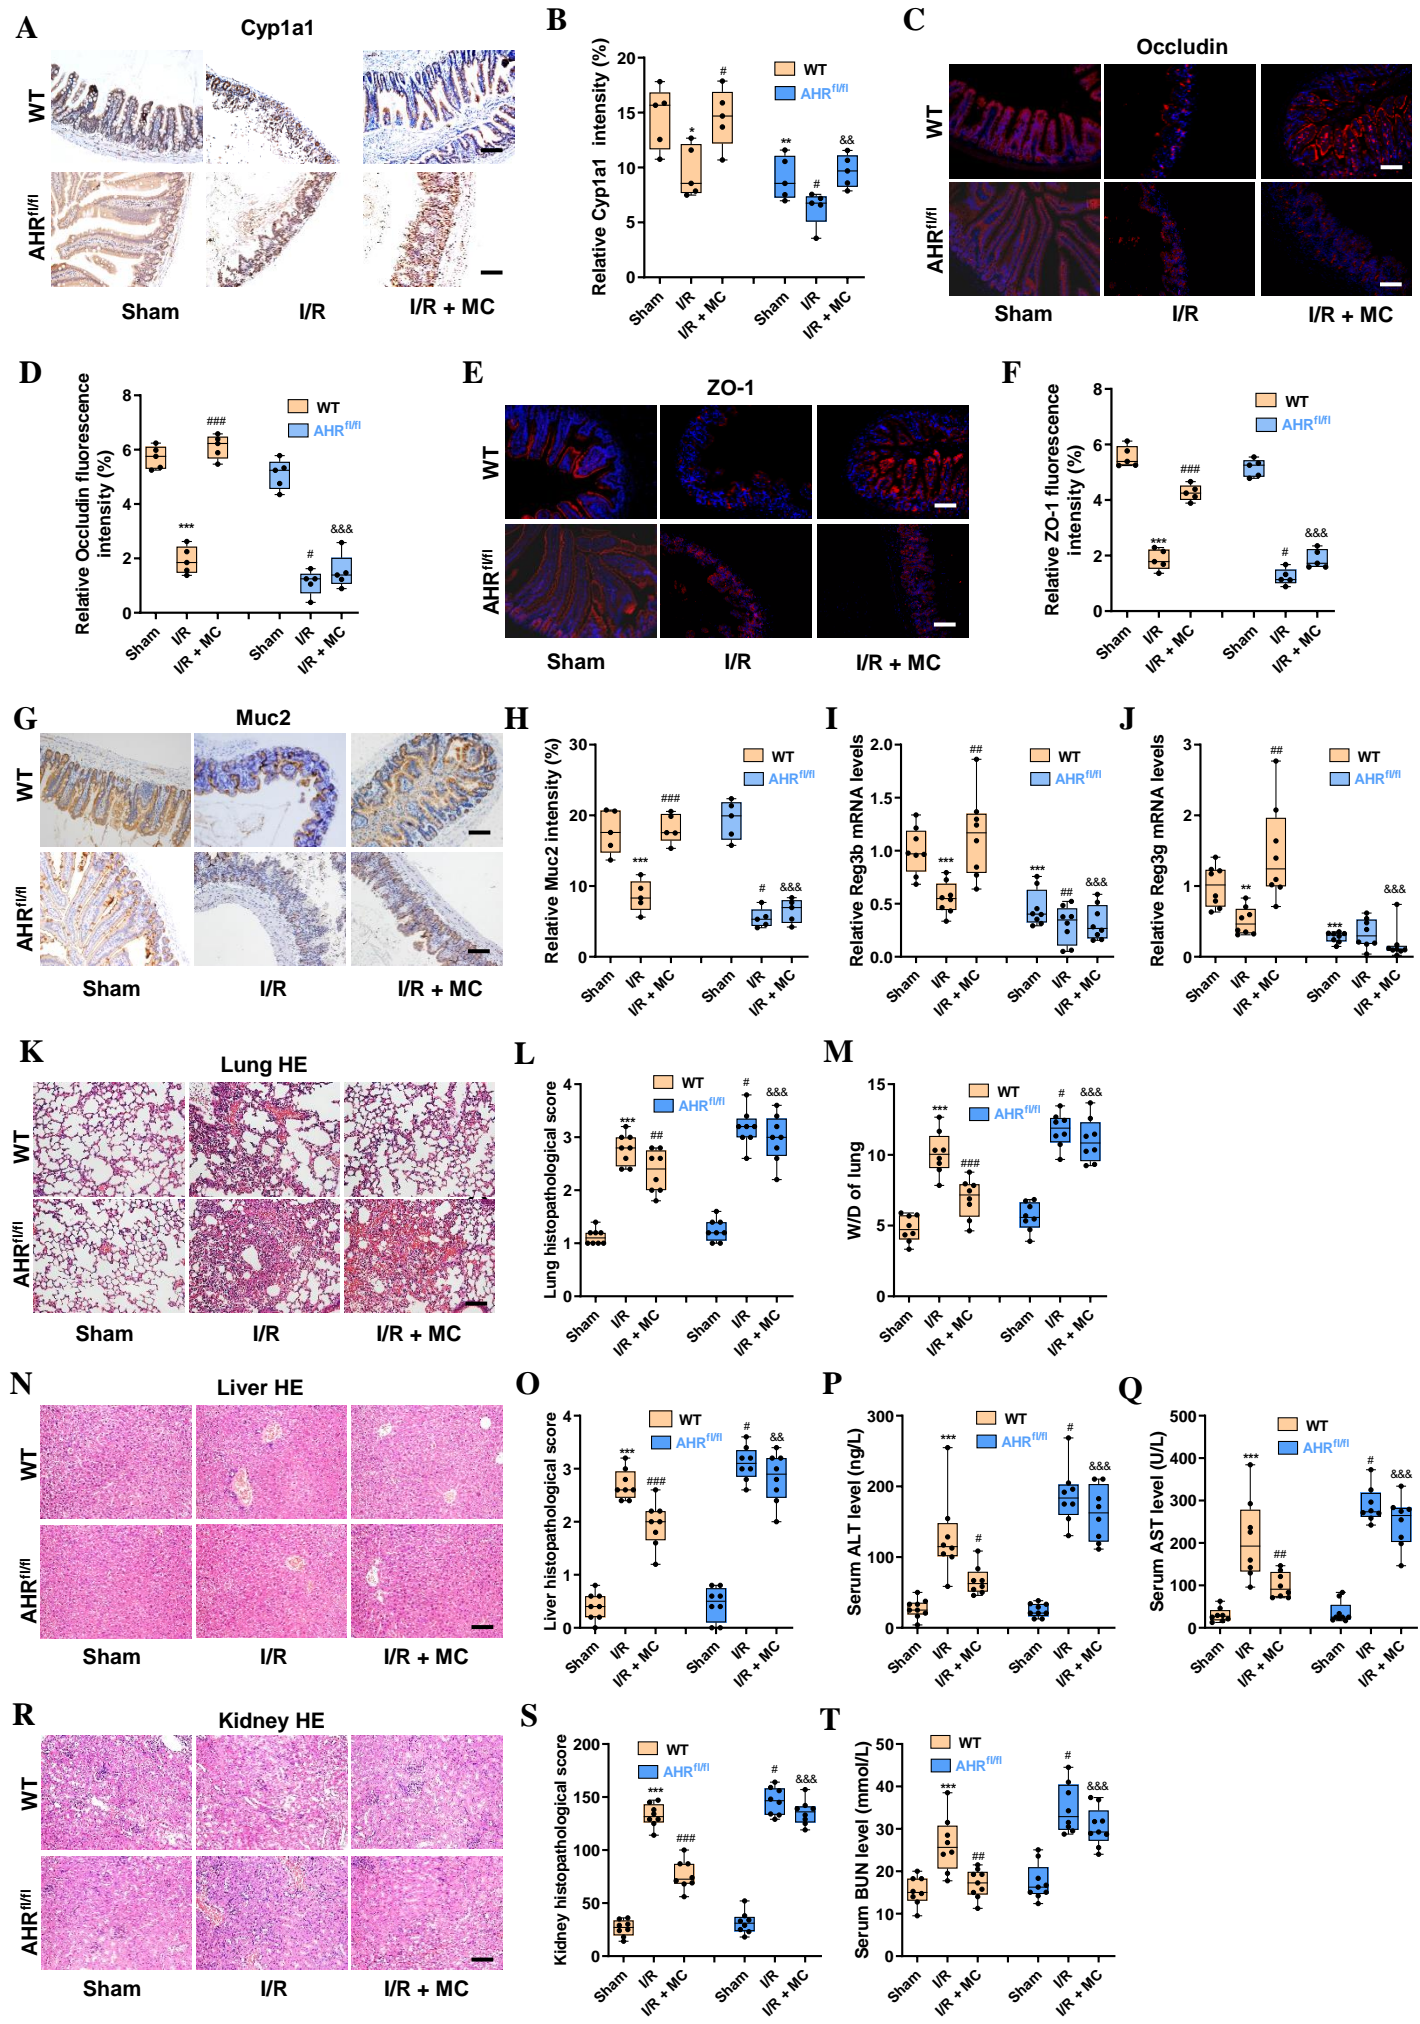

**Supplemental Figure S3. Milnacipran attenuates intestinal I/R injury by activating the intestinal epithelial AHR.** Related to Figures 4.

(A-B) Immunohistochemical results (A) and relative quantitative analysis (B) of cyp11a1 in intestinal tissue; the scale bar is 100  $\mu$ m (n = 5). (C-D) Immunofluorescence results (C) and relative quantitative analysis (D) of Occludin in intestinal tissue; the scale bar is 100  $\mu$ m (n = 5). (E-F) Immunofluorescence results (E) and relative quantitative analysis (F) of ZO-1 in intestinal tissue; the scale bar is 100  $\mu$ m (n = 5). (G-H) Immunohistochemical results (G) and relative quantitative analysis (H) of Muc2 in intestinal tissue; the scale bar is 100  $\mu$ m (n = 5). (I-J) The mRNA levels of the intestinal immune barrier markers Reg3b (I) and Reg3g (J) (n = 8). (K-M) Mouse lung tissue HE staining (K); the pathological damage scores (L) and wet/dry weight ratios (M); the scale bar is 100  $\mu$ m (n = 8). (N-Q) Mouse liver tissue HE staining (N); the pathological damage scores (O) and plasma ALT (P) and AST levels (Q); the scale bar is 100  $\mu$ m (n = 8). (R-T) Mouse kidney tissue HE staining (R); the pathological damage scores (S) and plasma BUN levels (T); the scale bar is 100  $\mu$ m (n = 8). The results are expressed as the median and quartile, and are representative of three independent experiments. \*, # and &  $p < 0.05$ , \*\*, ## and &&  $p < 0.01$ , \*\*\*, ### and &&&  $p < 0.001$  were determined by two-way ANOVA and Tukey's post hoc test. "\*" indicates  $p < 0.05$  compared with wild-type mouse Sham group; "#" indicates  $p < 0.05$  compared with wild-type mouse I/R group; "&" indicates  $p < 0.05$  compared with wild-type mouse I/R+MC group. I/R + MC group: WT mice or AHR<sup>flox/flox</sup> mice were injected intraperitoneally with 10 mg/kg MC 1 hour before intestinal I/R.

Figure S4

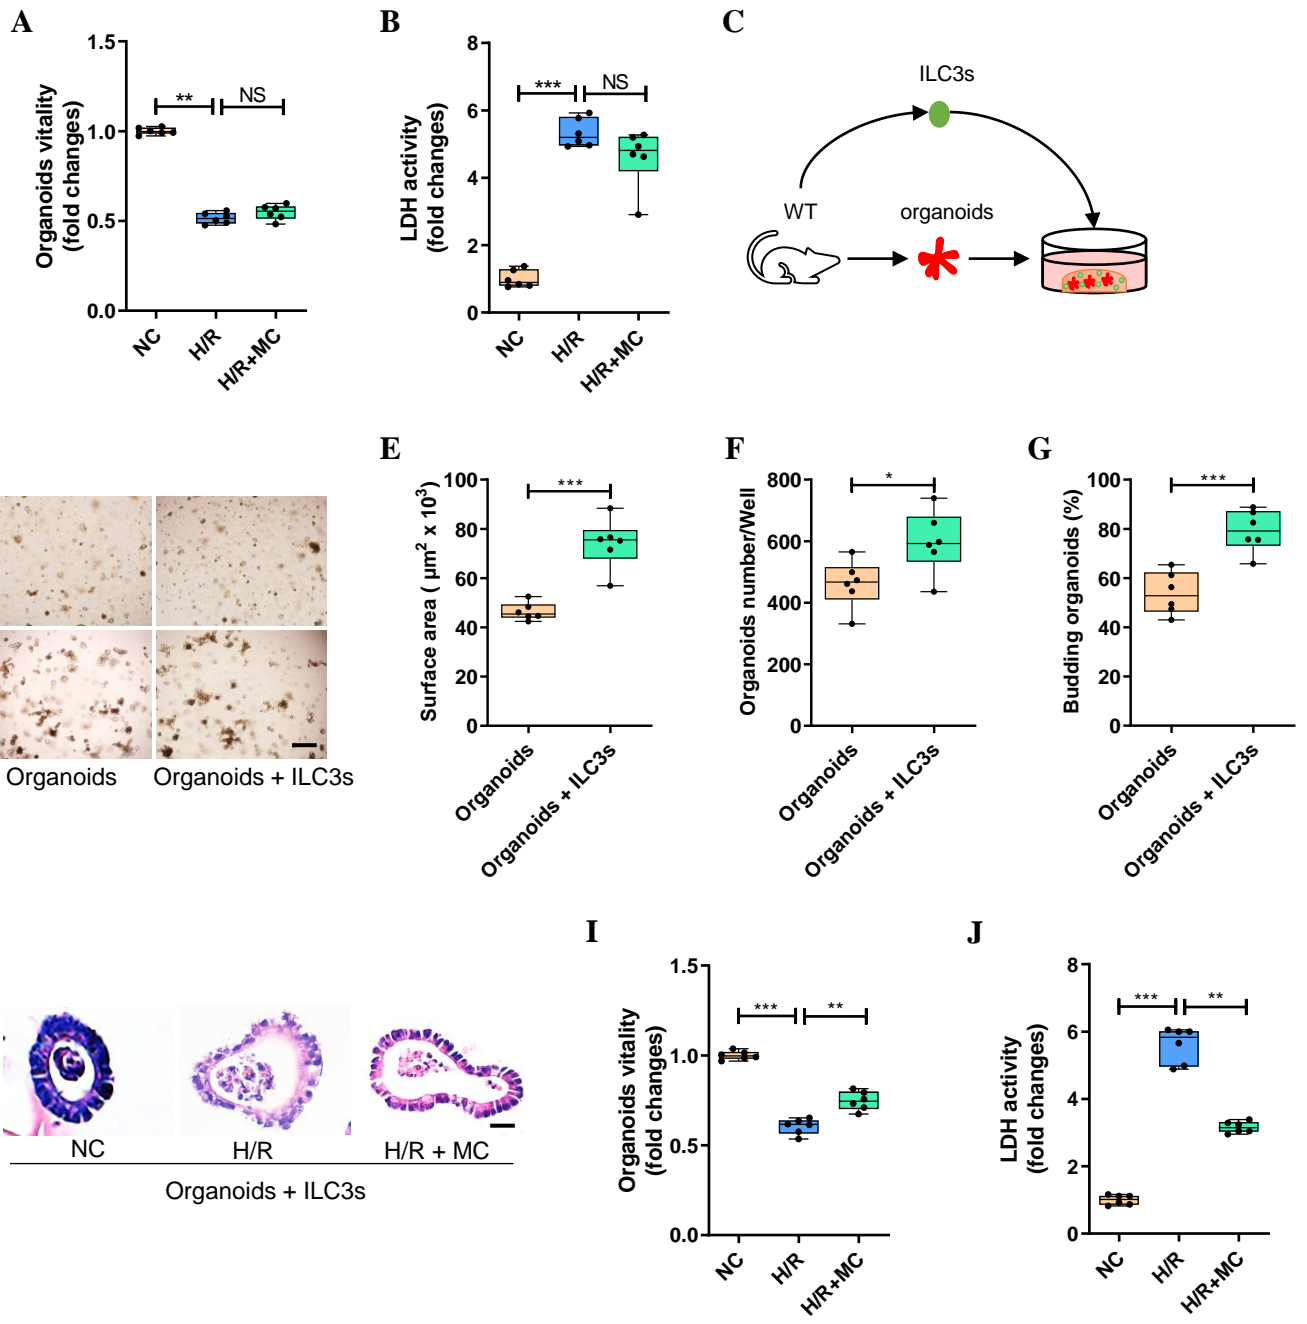



**Supplemental Figure S4. Supplementation with ILC3s restores the protective effect of milnacipran against H/R injury in intestinal organoids.** Related to Figures 4.

(A, B) Intestinal organoid viability (A) and lactate dehydrogenase (LDH) levels (B) in culture medium were detected after H/R in intestinal organoids cultured alone (n = 6). (C) Schematic diagram of the coculture system of intestinal organoids and ILC3s. (D) Brightfield images of organoids without or with ILC3s on day 1 (scale bar is 400  $\mu\text{m}$ ) and day 5 (scale bar is 50  $\mu\text{m}$ ) (n = 6). (E-G) Microscopic tracing of organoids to measure surface area (E), organoid numbers (F) and the percentage of budding organoids (G) on day 5 (n = 6). (H) Hematoxylin-eosin (HE) staining of intestinal organoids; the scale bar is 20  $\mu\text{m}$  (n = 6). (I) Intestinal organoid viability (n = 6). (J) LDH levels in the medium (n = 6). The results are expressed as the median and quartile, and are representative of three independent experiments. \*  $p < 0.05$ , \*\*  $p < 0.01$ , \*\*\*  $p < 0.001$  were determined by one-way ANOVA and Tukey's post hoc test in A, B, I, J, and Mann Whitney test in E-G.

**A** Figure S5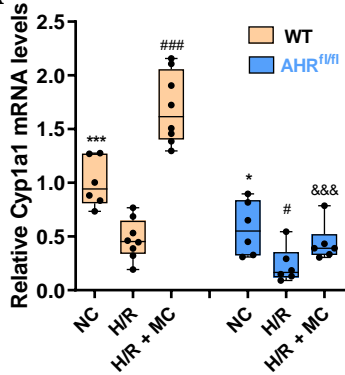**B**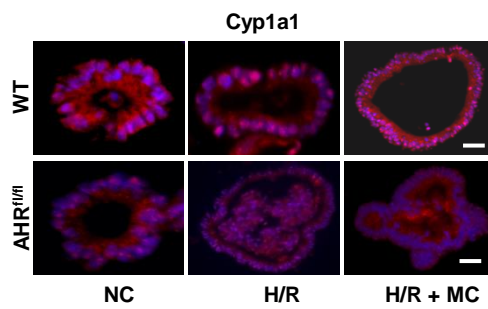**C**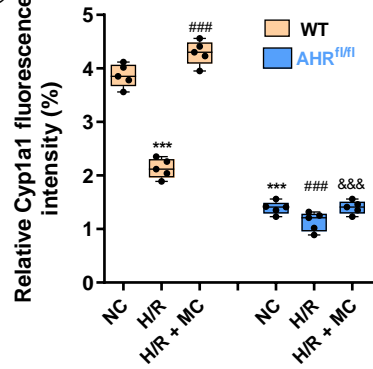**D**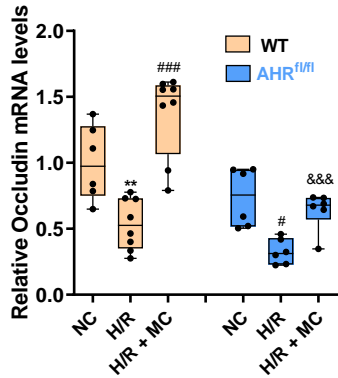**E**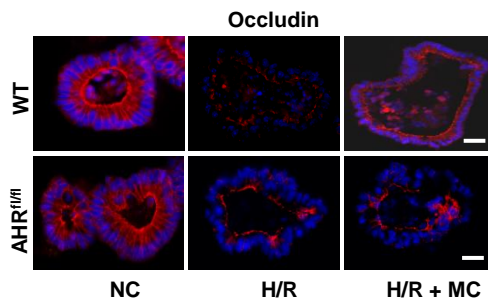**F**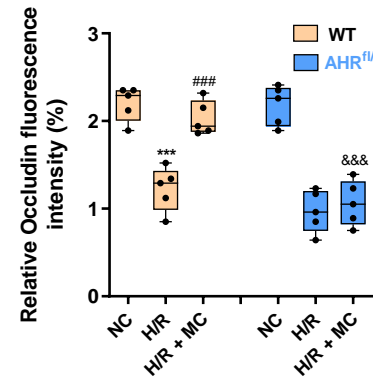**G**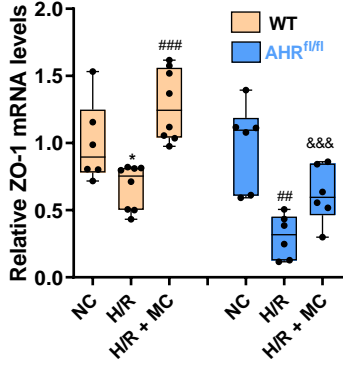**H**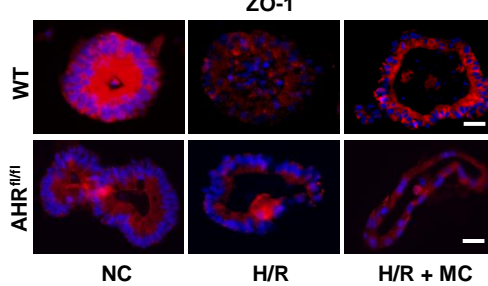**I**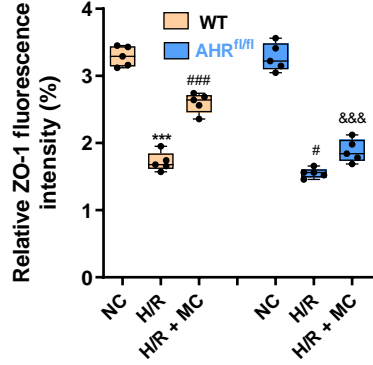**J**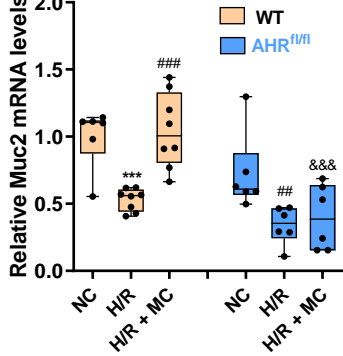**K**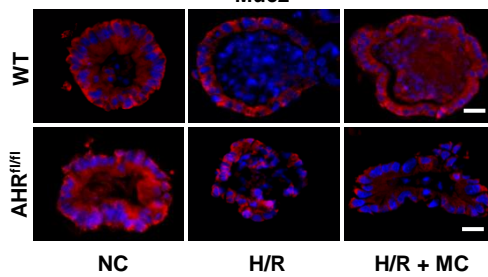**L**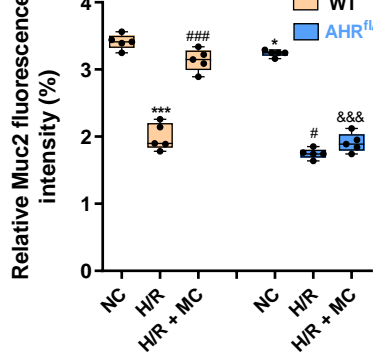**M**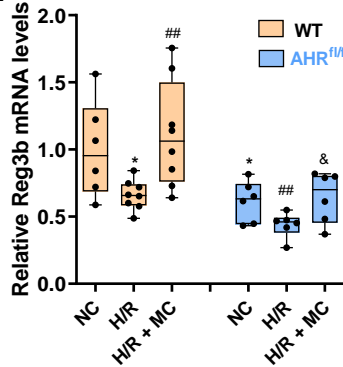**N**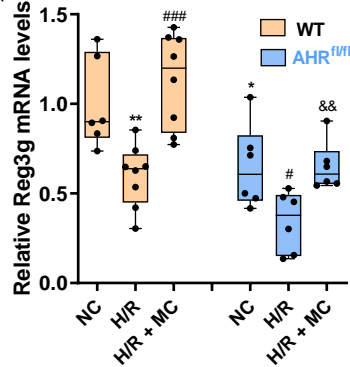

**Supplemental Figure S5. Milnacipran (MC) maintains intestinal organoid barrier homeostasis by activating the intestinal epithelial AHR.** Related to Figures 4.

(A) The mRNA levels of *cyp11a1* in intestinal organoids (n = 6). (B-C) Immunofluorescence (B) and relative quantitative analysis (C) of *cyp11a1* in intestinal organoids; the scale bar is 20  $\mu\text{m}$  (n = 5). (D) The mRNA levels of Occludin in intestinal organoids (n = 6). (E-F) Immunofluorescence (E) and relative quantitative analysis (F) of Occludin in intestinal organoids; the scale bar is 20  $\mu\text{m}$  (n = 5). (G) The mRNA levels of ZO-1 in intestinal organoids (n = 6). (H-I) Immunofluorescence (H) and relative quantitative analysis (I) of ZO-1 in intestinal organoids; the scale bar is 20  $\mu\text{m}$  (n = 5). (J) The mRNA levels of *Muc2* in intestinal organoids (n = 6). (K-L) Immunofluorescence (K) and relative quantitative analysis (L) of *Muc2* in intestinal organoids; the scale bar is 20  $\mu\text{m}$  (n = 5). (M-N) The mRNA levels of *Reg3b* (M) and *Reg3g* (N) (n = 6). The results are expressed as the median and quartile, and are representative of three independent experiments. \*, # and &  $p < 0.05$ , \*\*, ## and &&  $p < 0.01$ , \*\*\*, ### and &&&  $p < 0.001$  were determined by two-way ANOVA and Tukey's post hoc test. "\*" indicates  $p < 0.05$  compared with wild-type mouse NC group; "#" indicates  $p < 0.05$  compared with wild-type mouse H/R group; "&" indicates  $p < 0.05$  compared with wild-type mouse H/R+MC group. H/R + MC group: 10  $\mu\text{mol/L}$  MC was added to intestinal organoids 1 h before H/R.

Figure S6

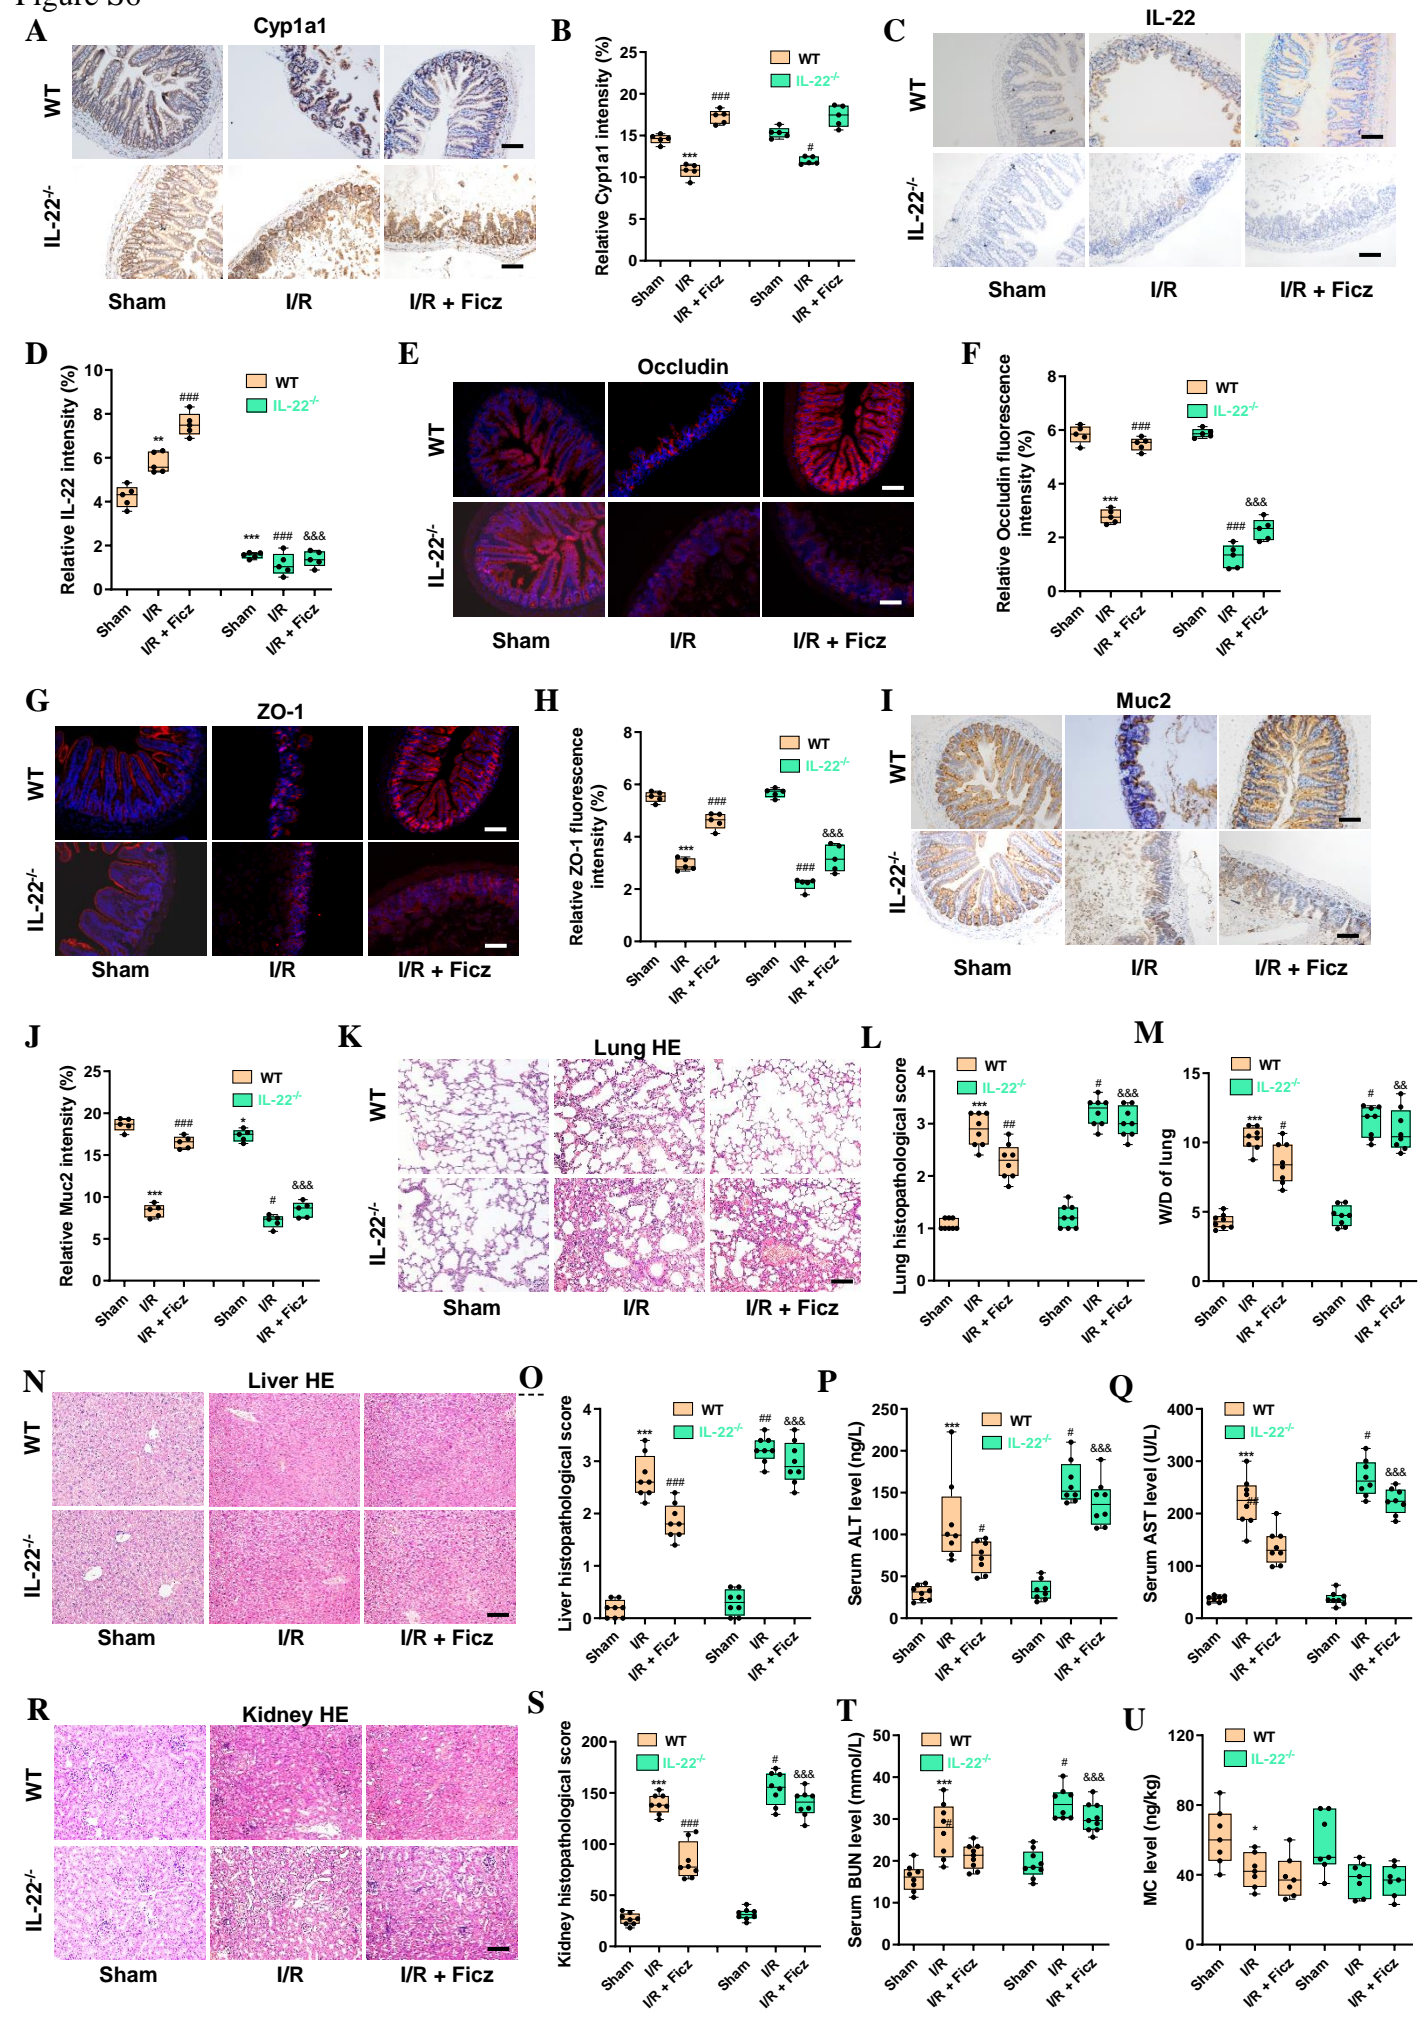

**Supplemental Figure S6. AHR activator Ficiz attenuates intestinal I/R injury in mice by releasing IL-22.** Related to Figures 6.

(A-B) Immunohistochemical results (A) and relative quantitative analysis (B) of cyp11a1 in intestinal tissue; the scale bar is 100  $\mu$ m (n = 5). (C-D) Immunohistochemical results (C) and relative quantitative analysis (D) of IL-22 in intestinal tissue; the scale bar is 100  $\mu$ m (n = 5). (E-F) Immunofluorescence results (E) and relative quantitative analysis (F) of Occludin in intestinal tissue; the scale bar is 100  $\mu$ m (n = 5). (G-H) Immunofluorescence results (G) and relative quantitative analysis (H) of ZO-1 in intestinal tissue; the scale bar is 100  $\mu$ m (n = 5). (I-J) Immunohistochemical results (I) and relative quantitative analysis (J) of Muc2 in intestinal tissue; the scale bar is 100  $\mu$ m (n = 5). (K-M) Mouse lung tissue hematoxylin-eosin (HE) staining (K); the pathological damage scores (L) and wet/dry weight ratios (M); the scale bar is 100  $\mu$ m (n = 8). (N-Q) Mouse liver tissue HE staining (N); the pathological damage scores (O) and plasma ALT (P) and AST levels (Q); the scale bar is 100  $\mu$ m (n = 8). (R-T) Mouse kidney tissue HE staining (R); the pathological damage scores (S) and plasma BUN levels (T); the scale bar is 100  $\mu$ m (n = 8). (U) LC-MS/MS-targeted detection of the MC content in the feces. The results are expressed as the median and quartile, and are representative of three independent experiments. \*, # and &  $p < 0.05$ , \*\*, ## and &&  $p < 0.01$ , \*\*\*, ### and &&&  $p < 0.001$  by were determined were determined by two-way ANOVA and Tukey's post hoc test. "\*" indicates  $p < 0.05$  compared with wild-type mouse Sham group; "#" indicates  $p < 0.05$  compared with wild-type mouse I/R group; "&" indicates  $p < 0.05$  compared with wild-type mouse I/R+Ficz group. I/R + Ficiz group: mice were treated with daily intraperitoneal injection of 50  $\mu$ g/kg Ficiz for 7 consecutive days prior to induction of intestinal I/R.

**A** Figure S7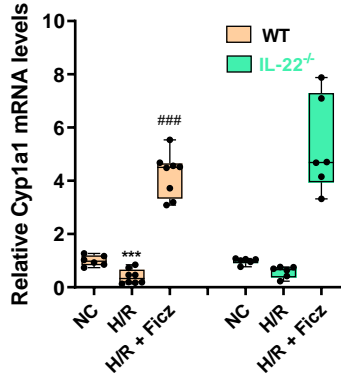**B**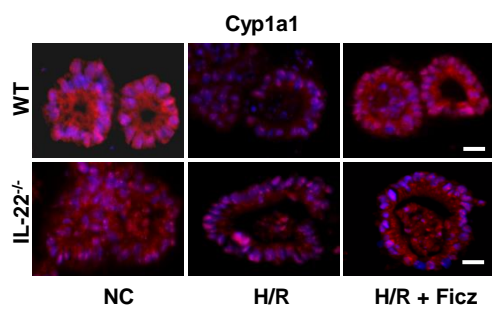**C**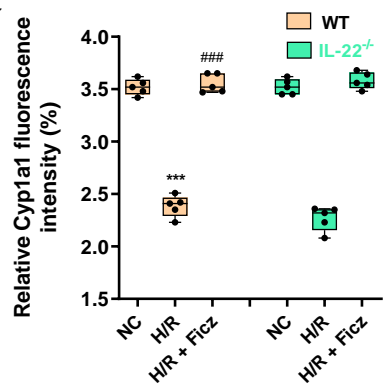**D**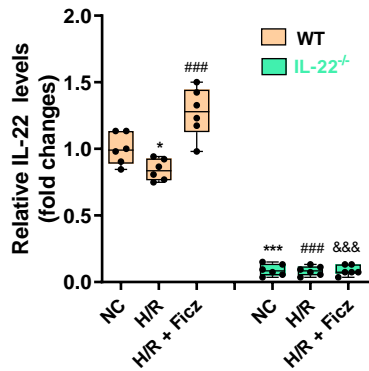**E**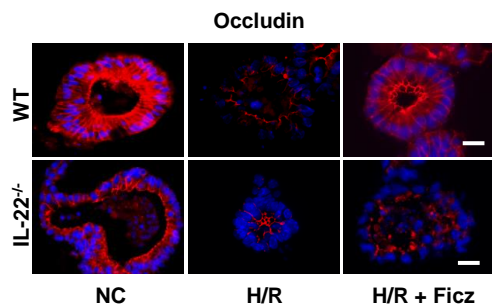**F**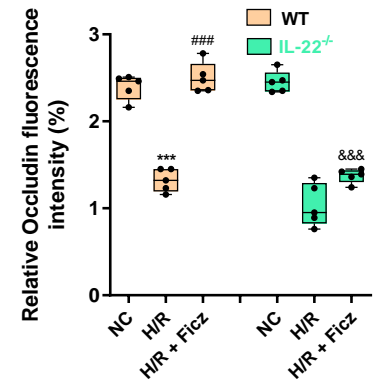**G**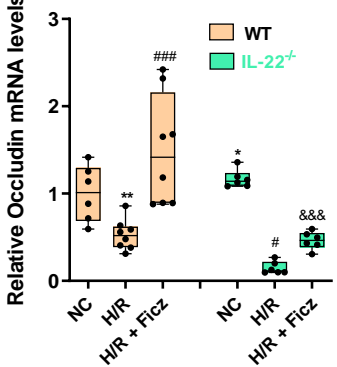**H**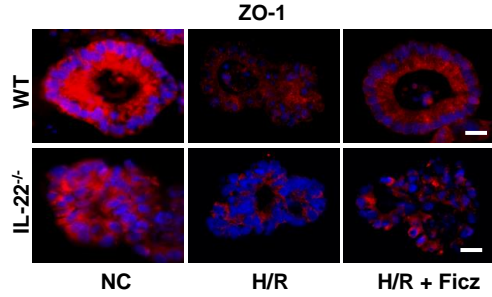**I**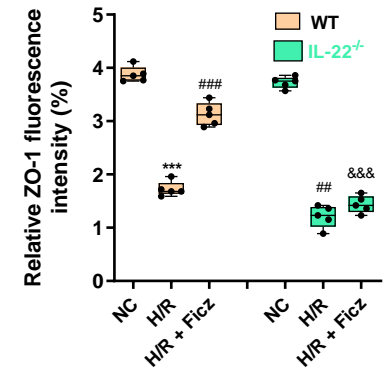**J**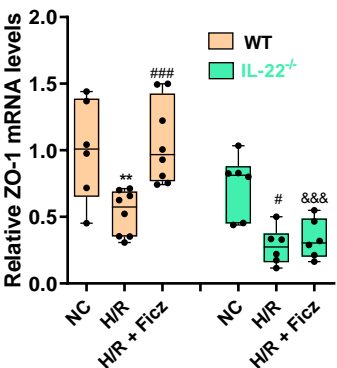**K**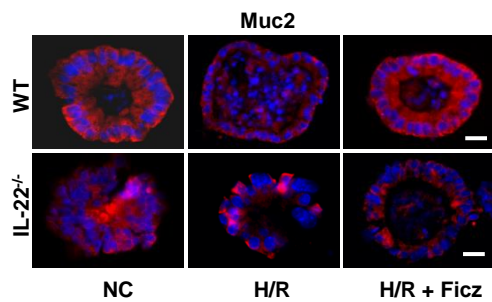**L**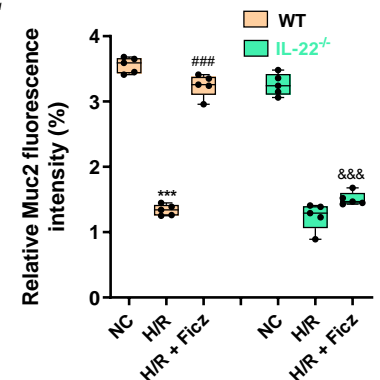**M**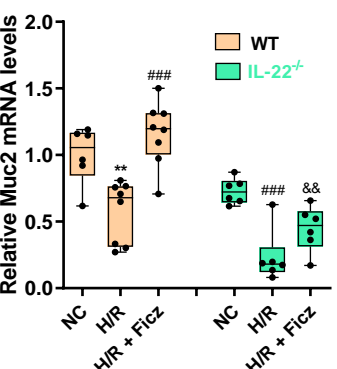**N**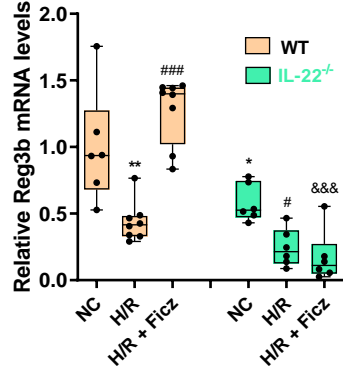**O**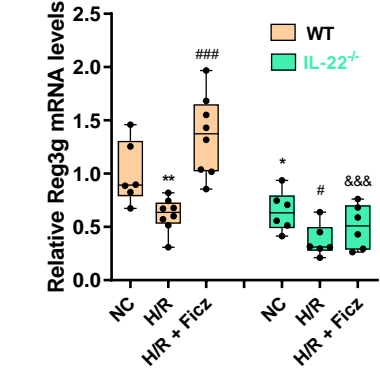

**Supplemental Figure S7. AHR activator Ficz maintains intestinal organoid barrier homeostasis by releasing IL-22.** Related to Figures 6.

(A) The mRNA levels of *cyp11a1* in intestinal organoids (n = 6). (B-C) Immunofluorescence (B) and relative quantitative analysis (C) of *cyp11a1* in intestinal organoids; the scale bar is 20  $\mu\text{m}$  (n = 5). (D) The IL-22 levels in the medium (n = 6). (E-F) Immunofluorescence (E) and relative quantitative analysis (F) of Occludin in intestinal organoids; the scale bar is 20  $\mu\text{m}$  (n = 5). (G) The mRNA levels of Occludin in intestinal organoids (n = 6). (H-I) Immunofluorescence (H) and relative quantitative analysis (I) of ZO-1 in intestinal organoids; the scale bar is 20  $\mu\text{m}$  (n = 5). (J) The mRNA levels of ZO-1 in intestinal organoids (n = 6). (K-L) Immunofluorescence (K) and relative quantitative analysis (L) of Muc2 in intestinal organoids; the scale bar is 20  $\mu\text{m}$  (n = 5). (M) The mRNA levels of Muc2 in intestinal organoids (n = 6). (N-O) The mRNA levels of Reg3b (N) and Reg3g (O) (n = 6). The results are expressed as the median and quartile, and are representative of three independent experiments. \*, # and &  $p < 0.05$ , \*\*, ## and &&  $p < 0.01$ , \*\*\*, ### and &&&  $p < 0.001$  were determined by two-way ANOVA and Tukey's post hoc test. "\*" indicates  $p < 0.05$  compared with wild-type mouse NC group; "#" indicates  $p < 0.05$  compared with wild-type mouse H/R group; "&" indicates  $p < 0.05$  compared with wild-type mouse H/R+Ficz group. H/R + Ficz group: 200 nM Ficz was added to ILC3s and the intestinal organoid coculture system 1 hour before H/R.

**Supplemental Table S1. The characteristics of patients with cardiopulmonary bypass (CPB).**

Related to Figures 2.

| <b>Parameter</b>                                           | <b>NAGI group (n=25)</b> | <b>AGI group (n=31)</b> | <b>P</b> |
|------------------------------------------------------------|--------------------------|-------------------------|----------|
| Age (years)                                                | 56.0 (45.0~62.0)         | 57.00 (49.5~63.5)       | 0.4839   |
| Females (n)                                                | 15                       | 19                      | >0.9999  |
| BMI (Kg/m <sup>2</sup> )                                   | 23.56 (16-33.78)         | 24.09 (18.75-26.78)     | 0.5859   |
| Duration hospitalization (days)                            | 19.0 (17.0-25.0)         | 19.0 (14.0-27.0)        | 0.565    |
| Duration anesthesia (minutes)                              | 356.0 (340.0-422.0)      | 305.3 (280.0-362.5)     | 0.3253   |
| Duration surgery (minutes)                                 | 260.0 (225.0-297.0)      | 254.0 (237.0-324.5)     | 0.3176   |
| Duration CPB (minutes)                                     | 132.0 (103.0-169.0)      | 112.0 (93.0-165.5)      | 0.5377   |
| Bleeding volume (ml)                                       | 300 (300-400)            | 300 (300-400)           | 1        |
| The time from the end of surgery to the first meal (hours) | 24.10 (22.45-28.50)      | 30.71 (28.63-41.45)     | <0.001   |
| ICU care duration (hours)                                  | 48.56 (44.25-63.20)      | 85.95 (75.65-92.00)     | <0.001   |
| Preoperative MC content in feces (ng/kg)                   | 241.11 (31.68-281.25)    | 25.32 (17.19-48.33)     | <0.001   |



**Supplemental Table S2. The quantitative RT-PCR primer sequence.** Related to STAR Methods section

| <b>Gene</b> | <b>Forward primer (5'-3')</b> | <b>Reverse primer (5'-3')</b> |
|-------------|-------------------------------|-------------------------------|
| 18S         | CGATCCGAGGGCCTCACTA           | AGTCCCTGCCCTTTGTACACA         |
| ZO-1        | AGAGACAAGATGTCCGCCAG          | TGCAATTCAAATCCAAACC           |
| Occludin    | CATTTATGATGAACAGCCCC          | GGACTGTCAACTCTTTCCGC          |
| Ki67        | ATCATTGACCGCTCCTTTAGGT        | GCTCGCCTTGATGGTTCCT           |
| Lgr5        | CCTACTCGAAGACTTACCCAGT        | GCATTGGGGTGAATGATAGCA         |
| Cyp1a1      | CAATGAGTTTGGGGAGGTTACTG       | CCCTTCTCAAATGTCCTGTAGTG       |
| Reg3b       | ACTCCCTGAAGAATATACCCTCC       | CGCTATTGAGCACAGATACGAG        |
| Reg3g       | ATGCTTCCCCGTATAACCATCA        | GGCCATATCTGCATCATAACCAG       |
| IL-22       | GCTGCCTGCTTCTCATTGC           | AAGGTGCGGTTGACGATGTA          |
| Muc2        | GGTGACACTGACGCTGGTTT          | ACTGGTGAACACCGCGATAATA        |
| 16S         | GTGSTGCAYGGYTGTCGTCA          | ACGTCRTCCMCACCTTCCTC          |
| Wnt3        | TGGAAGTGTACCACCATAGATGAC      | ACACCAGCCGAGGCGATG            |
| Notch1      | GATGGCCTCAATGGGTACAAG         | TCGTTGTTGTTGATGTCACAGT        |
